# Supplementary material
Source: publisher figshare collection journal article supplement (https://f1000.figshare.com/ndownloader/files/714134)
Supplement: Supplementary file 1 [file 714134]

## Sheet: Sheet1
niiA4						MK85						MK198
Date	Image	Conidiophore	Measure	Size		Date	Image	Conidiophore	Measure	Size		Date	Image	Conidiophore	Measure	Size
30.9.11	Control		1.324			30.9.11	Control		1.324			30.9.11	Control		1.324
	8	1	0.905	34.1767			3	1	1.692	63.8973			1	1	2.4	90.6344
		2	1.253	47.3187			4	1	1.526	57.6284				2	1.73	65.3323
		3	1.581	59.7054			5	1	1.774	66.994				3	1.37	51.7372
	9	1	1.783	67.3338				2	1.758	66.3897			2	1	2.313	87.3489
		2	0.696	26.284				3	2.729	103.059				2	1.688	63.7462
		3	1.693	63.935			6	1	1.683	63.5574		25.10.11	1	1	1.686	63.6707
		4	1.197	45.2039				2	1.097	41.4275		2 day		2	1.062	40.1057
	10	1	2.022	76.3595				3	1.546	58.3837				3	1.026	38.7462
	11	1	0.481	18.1647			7	1	1.146	43.2779				4	1.306	49.3202
		2	1.27	47.9607				2	1.954	73.7915				5	1.893	71.4879
		3	1.233	46.5634		25.10.11	11	1	1.445	54.5695				6	1.315	49.6601
		4	0.968	36.5559		2 day		2	1.413	53.361			2	1	1.148	43.3535
	12	1	1.566	59.139				3	1.916	72.3565				2	1.481	55.929
		2	1.345	50.7931			12	1	1.351	51.0196				3	1.838	69.4109
25.10.11	22	1	2.111	79.7205				2	1.601	60.4607				4	1.712	64.6526
2 day		2	1.446	54.6073			13	1	1.655	62.5				5	1.322	49.9245
		3	1.731	65.3701				2	0.677	25.5665				6	1.221	46.1103
		4	2.337	88.2553				3	1.419	53.5876			3	1	1.89	71.3746
		5	2.071	78.21				4	1.404	53.0211				2	1.126	42.5227
		6	1.421	53.6631			14	1	1.399	52.8323				3	1.367	51.6239
	23	1	1.533	57.8927				2	2.014	76.0574			4	1	2.176	82.1752
		2	1.372	51.8127			16	1	1.567	59.1767				2	2.262	85.423
		3	1.902	71.8278				2	0.806	30.4381				3	1.231	46.4879
		4	1.711	64.6148				3	1.535	57.9683				4	1.484	56.0423
		5	2.362	89.1994			17	1	1.342	50.6798			5	1	2.937	110.914
		6	1.348	50.9063				2	0.932	35.1964			6	1	2.91	109.894
	24	1	2.122	80.136				3	1.663	62.8021				2	1.935	73.074
	25	1	1.479	55.8535				4	0.836	31.571				3	0.988	37.3112
		2	2.313	87.3489			18	1	0.732	27.6435				4	0.63	23.7915
		3	0.93	35.1208				2	0.6	22.6586				5	1.592	60.1208
		4	2.712	102.417			19	1	0.992	37.4622				6	1.611	60.8384
	26	1	0.723	27.3036				2	0.745	28.1344				7	0.763	28.8142
		2	1.446	54.6073				3	1.385	52.3036			7	1	1.368	51.6616
	27	1	2.443	92.2583				4	0.777	29.3429				2	1.786	67.4471
	28	1	1.98	74.7734			20	1	0.6	22.6586				3	1.444	54.5317
	29	1	1.776	67.0695			21	1	1.279	48.3006				4	1.731	65.3701
		2	1.746	65.9366				2	2.362	89.1994			8	1	2.172	82.0242
		3	1.249	47.1677				3	0.912	34.4411			9	1	2.375	89.6903
		4	1.806	68.2024				4	2.114	79.8338				2	2.036	76.8882
	30	1	1.664	62.8399		26.10.11	1	1	1.1014	41.5937				3	2.464	93.0514
		2	1.364	51.5106		24 hr		2	0.695	26.2462				4	2.649	100.038
26.10.11	27	1	1.334	50.3776				3	0.978	36.9335				5	2.681	101.246
24 hr		2	1.656	62.5378				4	1.415	53.4366				6	2.009	75.8686
	28	1	1.388	52.4169			2	1	1.479	55.8535			10	1	0.965	36.4426
		2	0.749	28.2855			3	1	1.799	67.9381				2	1.829	69.071
		3	1.837	69.3731				2	1.068	40.3323				3	1.178	44.4864
	29	1	1.556	58.7613				3	0.53	20.0151				4	1.528	57.7039
		2	1.945	73.4517				4	2.003	75.642		26.10.11	13	1	1.635	61.7447
		3	1.313	49.5846			4	1	1.176	44.4109		24 hr		2	1.374	51.8882
		4	1.784	67.3716				2	1.659	62.6511				3	1.66	62.6888
	30	1	1.541	58.1949				3	0.673	25.4154			14	1	2.034	76.8127
		2	1.334	50.3776				4	0.407	15.3701				2	2.025	76.4728
	31	1	1.54	58.1571			5	1	1.273	48.074			15	1	1.175	44.3731
		2	1.241	46.8656				2	1.582	59.7432				2	0.788	29.7583
		3	1.301	49.1314				3	0.997	37.6511				3	1.584	59.8187
	32	1	0.864	32.6284			6	1	1.973	74.5091				4	1.816	68.5801
		2	1.947	73.5272			7	1	1.721	64.9924				5	1.702	64.2749
		3	1.753	66.2009				2	2.028	76.5861				6	2.538	95.8459
		4	0.751	28.361				3	1.939	73.2251				7	2.364	89.2749
		5	1.535	57.9683				4	2.379	89.8414				8	2.098	79.2296
		6	0.958	36.1782			8	1	2.225	84.0257			16	1	2.625	99.1314
	33	1	1.136	42.9003				2	1.982	74.8489				2	1.281	48.3761
		2	2.632	99.3958			9	1	2.066	78.0211				3	2.601	98.2251
		3	2.761	104.267				2	1.561	58.9502				4	1.289	48.6782
		4	2.743	103.588				3	1.018	38.4441				5	1.04	39.2749
		5	2.192	82.7795				4	1.373	51.8505				6	1.536	58.006
		6	2.057	77.6813			10	1	2.121	80.0982				7	0.998	37.6888
		7	1.365	51.5483				2	2.086	78.7764				8	1.396	52.719
		8	1.035	39.0861				3	1.301	49.1314				9	2.681	101.246
	34	1	1.988	75.0755				4	1.91	72.1299				10	1.233	46.5634
		2	1.145	43.2402			11	1	1.075	40.5967			17	1	1.163	43.9199
		3	0.904	34.139				2	0.469	17.7115				2	1.391	52.5302
		4	1.296	48.9426				3	1.388	52.4169				3	0.955	36.065
		5	1.672	63.142				4	0.916	34.5921				4	0.79	29.8338
		6	0.896	33.8369				5	1.133	42.787				5	1.325	50.0378
	35	1	2.029	76.6239				6	0.923	34.8565				6	0.839	31.6843
		2	2.045	77.2281			12	1	1.298	49.0181				7	1.691	63.8595
		3	2.546	96.148				2	2.083	78.6631				8	2.089	78.8897
		4	1.975	74.5846				3	2.209	83.4215			18	1	1.969	74.358
		5	0.91	34.3656				4	2.297	86.7447				2	1.572	59.3656
		6	0.642	24.2447				5	1.249	47.1677				3	1.509	56.9864
		7	1.955	73.8293				6	1.033	39.0106				4	1.577	59.5544
	36	1	2.169	81.9109				7	1.706	64.426				5	0.587	22.1677
		2	2.107	79.5695		3.11.11	11	1	1.669	63.0287				6	1.73	65.3323
		3	1.542	58.2326		18 hr		2	2.234	84.3656				7	1.616	61.0272
		4	1.599	60.3852				3	1.948	73.565				8	1.955	73.8293
		5	0.976	36.858				4	1.64	61.9335				9	0.545	20.5816
		6	1.245	47.0166				5	1.919	72.4698			19	1	1.682	63.5196
		7	1.356	51.2085			12	1	1.108	41.8429				2	1.688	63.7462
		8	2.005	75.7175				2	2.198	83.006				3	1.724	65.1057
27.9.11	9	1	1.96	74.0181				3	1.254	47.3565			20	1	2.292	86.5559
24 hr		2	2.002	75.6042		20 hr	23	1	1.284	48.4894			21	1	2.23	84.2145
		3	1.47	55.5136				2	2.255	85.1586				2	2.03	76.6616
		4	1.401	52.9079				3	1.267	47.8474				3	1.576	59.5166
		5	1.315	49.6601				4	1.919	72.4698				4	1.84	69.4864
		6	1.676	63.2931		27.9.11	9	1	1.999	75.4909				5	1.426	53.852
		7	2.129	80.4003		24 hr		2	1.628	61.4804				6	1.769	66.8051
		8	1.066	40.2568				3	1.652	62.3867				7	1.013	38.2553
		9	1.852	69.9396				4	1.64	61.9335				8	1.541	58.1949
	8	1	1.028	38.8218				5	1.086	41.0121			22	1	1.607	60.6873
		2	0.445	16.8051			8	1	1.347	50.8686				2	2.054	77.568
		3	0.91	34.3656				2	1.321	49.8867				3	1.089	41.1254
	7	1	1.345	50.7931				3	1.432	54.0785			23	1	2.192	82.7795
		2	1.642	62.0091				4	1.462	55.2115				2	1.564	59.0634
	6	1	0.756	28.5498				5	1.22	46.0725				3	2.518	95.0906
		2	1.631	61.5937				6	1.555	58.7236				4	1.608	60.7251
		3	1.435	54.1918				7	2.439	92.1073			25	1	2.353	88.8595
		4	0.844	31.8731			7	1	0.969	36.5937				2	2.309	87.1979
	5	1	1.989	75.1133				2	1.419	53.5876				3	1.652	62.3867
		2	0.885	33.4215			6	1	2.026	76.5106				4	1.609	60.7628
		3	1.045	39.4637				2	1.391	52.5302			26	1	1.691	63.8595
		4	1.272	48.0363				3	0.733	27.6813				2	1.187	44.8263
		5	0.555	20.9592				4	1.533	57.8927				3	1.232	46.5257
	4	1	1.123	42.4094				5	1.558	58.8369				4	1.42	53.6254
		2	1.204	45.4683			5	1	1.568	59.2145				5	1.234	46.6012
		3	1.123	42.4094				2	1.67	63.0665				6	1.403	52.9834
			AVERAGE	57.4422					AVERAGE	55.6759					AVERAGE	62.486
			STDEV	19.4589					STDEV	18.4763					STDEV	19.6098
